# Supplementary material
Source: publisher figshare collection journal article supplement (https://plos.figshare.com/articles/dataset/_/9977900)
Supplement: Supplementary file [file 1]

**S1 Table. Frequency of HIV-GAG+ wells in each dilution dQVOA vs QVOA**

| Participant ID | dilution A <sup>1</sup><br>(+ wells/<br>total wells) | dilution B<br>(+ wells/<br>total wells) | dilution C<br>(+ wells/<br>total wells) | dilution D<br>(+ wells/<br>total wells) | dilution E<br>(+ wells/<br>total wells) | Infectious<br>Units Per<br>Million<br>(IUPM) |
|----------------|------------------------------------------------------|-----------------------------------------|-----------------------------------------|-----------------------------------------|-----------------------------------------|----------------------------------------------|
| NIH 2-20       | 1+/12                                                | 0+/7                                    | 0+/2                                    | NA                                      | NA                                      | 0.138                                        |
|                | 0+/24                                                | 0+/2                                    | 0+/2                                    | 0+/2                                    | 0+/2                                    | BD (0.028)                                   |
| NIH 2-37       | 8+/8                                                 | 2+/3                                    | 1+/2                                    | NA                                      | NA                                      | 8.595                                        |
|                | 9+/18                                                | 0+/2                                    | 0+/2                                    | 0+/2                                    | 1+/2                                    | 0.744                                        |
| 2147-R         | 11+/12                                               | 2+/5                                    | 0+/2                                    | 0+/2                                    | NA                                      | 3.986                                        |
|                | 1+/12                                                | 0+/2                                    | 0+/2                                    | NA                                      | NA                                      | 0.084                                        |
| 2026-R         | 2+/3                                                 | 4+/9                                    | 0+/2                                    | 0+/2                                    | NA                                      | 2.543                                        |
|                | 0+/12                                                | 0+/2                                    | 0+/2                                    | NA                                      | NA                                      | BD (0.056)                                   |
| 3068-R         | 5+/8                                                 | 2+/12                                   | 0+/2                                    | 0+/2                                    | NA                                      | 1.432                                        |
|                | 1+/12                                                | 0+/2                                    | 0+/2                                    | NA                                      | NA                                      | 0.084                                        |
| 2046-R         | 9+/12                                                | 2+/5                                    | 0+/2                                    | 0+/2                                    | NA                                      | 2.654                                        |
|                | 2+/12                                                | 0+/2                                    | 0+/2                                    | NA                                      | NA                                      | 0.175                                        |
| 2044-R         | 4+/12                                                | 2+/5                                    | 0+/2                                    | 0+/2                                    | NA                                      | 1.034                                        |
|                | 5+/12                                                | 1+/2                                    | 0+/2                                    | NA                                      | NA                                      | 0.624                                        |
| 2461-R         | 0+/12                                                | 0+/5                                    | 0+/2                                    | 0+/2                                    | NA                                      | BD (0.098)                                   |
|                | 0+/12                                                | 0+/2                                    | 0+/2                                    | NA                                      | NA                                      | BD (0.056)                                   |
| 2511-R         | 9+/12                                                | 3+/5                                    | 0+/2                                    | 0+/2                                    | NA                                      | 3.023                                        |
|                | 8+/12                                                | 1+/2                                    | 1+/2                                    | NA                                      | NA                                      | 1.335                                        |
| 2013-R         | 0+/12                                                | 0+/5                                    | 0+/2                                    | 0+/2                                    | NA                                      | BD (0.098)                                   |
|                | 0+/12                                                | 0+/2                                    | 0+/2                                    | NA                                      | NA                                      | BD (0.056)                                   |
| 2185-R         | 10+/12                                               | 3+/5                                    | 0+/2                                    | 0+/2                                    | NA                                      | 3.680                                        |
|                | 3+/12                                                | 0+/2                                    | 0+/2                                    | NA                                      | NA                                      | 0.275                                        |
| 2274-R         | 9+/9                                                 | 5+/5                                    | 0+/2                                    | 1+/2                                    | NA                                      | 17.218                                       |
|                | 11+/12                                               | 1+/2                                    | 0+/2                                    | NA                                      | NA                                      | 2.510                                        |
